# Supplementary material for: The Prevalence of Menstrual Cycle Disorders in Female Athletes from Different Sports Disciplines: A Rapid Review
Source: MDPI journal article supplement (doi:10.3390/ijerph192114243), 2022-10-31
Supplement: s1 [file s1]

Table S1: Checklist for quality assessment of the studies.

| <b>Adjusted Downs and Black Quality Assessment Checklist (1998) [24]</b> |                                                                                                                                                                                    |                                                     |
|--------------------------------------------------------------------------|------------------------------------------------------------------------------------------------------------------------------------------------------------------------------------|-----------------------------------------------------|
| <b>Item</b>                                                              | <b>Criteria</b>                                                                                                                                                                    | <b>Yes (1),<br/>No/<br/>Unable to determine (0)</b> |
| <b>Reporting</b>                                                         |                                                                                                                                                                                    |                                                     |
| 1.                                                                       | Is the hypothesis/aim/objective clearly described?                                                                                                                                 |                                                     |
| 2.                                                                       | Are the main outcomes to be measured clearly described in the Introduction or Methods section?                                                                                     |                                                     |
| 3.                                                                       | Are the characteristics of the participants included in the study clearly described?                                                                                               |                                                     |
| 6.                                                                       | Are the main findings of the study clearly described?                                                                                                                              |                                                     |
| 7.                                                                       | Does the study provide estimates of the random variability for the main outcomes?                                                                                                  |                                                     |
| 10.                                                                      | Have the probability values been reported for the main outcomes?                                                                                                                   |                                                     |
| <b>External validity</b>                                                 |                                                                                                                                                                                    |                                                     |
| 11.                                                                      | Were the subjects asked to participate in the study representative of the entire population from which they were recruited?                                                        |                                                     |
| 12.                                                                      | Were those subjects who were prepared to participate representative of the entire population from which they were recruited?                                                       |                                                     |
| <b>Internal validity – bias</b>                                          |                                                                                                                                                                                    |                                                     |
| 16.                                                                      | If any of the results of the study were based on “data dredging”, was this made clear?                                                                                             |                                                     |
| <b>Item</b>                                                              | <b>Criteria</b>                                                                                                                                                                    | <b>Yes (1),<br/>No/<br/>Unable to determine (0)</b> |
| 18.                                                                      | Were the statistical tests used to assess the main outcomes appropriate?                                                                                                           |                                                     |
| 20.                                                                      | Were the menstrual cycle regularity measures accurate (valid and reliable)?                                                                                                        |                                                     |
| 21.                                                                      | Were the participants in different intervention groups (trials and cohort studies) or were the cases and controls (case-control studies) recruited from the same population?       |                                                     |
| 22.                                                                      | Were study participants in different intervention groups (trials and cohort studies) or were the cases and controls (case-control studies) recruited over the same period of time? |                                                     |

Table S2. Adjusted Downs and Black Assessment Checklist evaluation.

| Study                            | 1 | 2 | 3 | 6 | 7 | 10 | 11 | 12 | 16 | 18 | 20 | 21 | 22 | Total score | Kennelly score (%) |
|----------------------------------|---|---|---|---|---|----|----|----|----|----|----|----|----|-------------|--------------------|
| Tsukahara et al. (2021) [60]     | 1 | 1 | 1 | 1 | 1 | 1  | 1  | 1  | 1  | 1  | 0  | 1  | 1  | 12          | 92,3               |
| Hutson et al. (2021) [51]        | 1 | 1 | 1 | 1 | 1 | 1  | 0  | 1  | 1  | 1  | 1  | 1  | 1  | 12          | 92,3               |
| Tenforde et al. (2015) [56]      | 1 | 1 | 1 | 1 | 1 | 1  | 0  | 1  | 1  | 1  | 1  | 1  | 0  | 11          | 84,6               |
| Feldmann et al., (2011) [63]     | 1 | 1 | 1 | 1 | 1 | 1  | 0  | 0  | 1  | 1  | 1  | 1  | 1  | 11          | 84,6               |
| Coelho et al. (2013) [75]        | 1 | 1 | 1 | 1 | 1 | 1  | 0  | 0  | 1  | 1  | 1  | 1  | 1  | 11          | 84,6               |
| Coste et al. (2011) [59]         | 1 | 1 | 1 | 1 | 1 | 1  | 0  | 0  | 1  | 1  | 1  | 1  | 1  | 11          | 84,6               |
| Schtscherbyna et al. (2009) [43] | 1 | 1 | 1 | 1 | 1 | 0  | 0  | 1  | 1  | 1  | 1  | 1  | 1  | 11          | 84,6               |
| Jesus et al. (2021) [42]         | 1 | 1 | 0 | 1 | 1 | 1  | 0  | 1  | 1  | 1  | 1  | 1  | 1  | 11          | 84,6               |
| Gibson et al. (2000) [44]        | 1 | 1 | 1 | 1 | 1 | 1  | 0  | 0  | 1  | 1  | 1  | 1  | 1  | 11          | 84,6               |
| Meng et al. (2020) [35]          | 1 | 1 | 1 | 1 | 1 | 1  | 0  | 0  | 1  | 1  | 1  | 1  | 0  | 10          | 76,9               |
| Haakonssen et al. (2014) [46]    | 1 | 1 | 0 | 1 | 1 | 1  | 0  | 0  | 1  | 1  | 1  | 1  | 1  | 10          | 76,9               |
| Rauh et al. (2014) [57]          | 1 | 1 | 0 | 1 | 1 | 1  | 0  | 0  | 1  | 1  | 1  | 1  | 1  | 10          | 76,9               |

|                                      |   |   |   |   |   |   |   |   |   |   |   |   |   |    |      |
|--------------------------------------|---|---|---|---|---|---|---|---|---|---|---|---|---|----|------|
| Roupas et al.<br>(2014) [68]         | 1 | 1 | 0 | 1 | 1 | 1 | 0 | 0 | 1 | 1 | 1 | 1 | 1 | 10 | 76,9 |
| Robbeson et al.<br>(2012) [62]       | 1 | 1 | 1 | 1 | 1 | 1 | 0 | 0 | 1 | 1 | 1 | 1 | 0 | 10 | 76,9 |
| Corujeira et al.<br>(2012) [73]      | 1 | 1 | 0 | 1 | 1 | 1 | 0 | 1 | 1 | 1 | 0 | 1 | 1 | 10 | 76,9 |
| Barrack et al.<br>(2010) [50]        | 1 | 1 | 1 | 1 | 1 | 0 | 0 | 0 | 1 | 1 | 1 | 1 | 1 | 10 | 76,9 |
| Barrack et al.<br>(2008) [49]        | 1 | 1 | 1 | 1 | 1 | 0 | 0 | 0 | 1 | 1 | 1 | 1 | 1 | 10 | 76,9 |
| Klinkowski et al. (2008) [30]        | 1 | 1 | 1 | 1 | 1 | 1 | 0 | 0 | 1 | 1 | 1 | 1 | 0 | 10 | 76,9 |
| Salbach et al.<br>(2007) [69]        | 1 | 1 | 1 | 1 | 1 | 1 | 0 | 1 | 1 | 0 | 0 | 1 | 1 | 10 | 76,9 |
| Burrows et al.<br>(2003) [54]        | 1 | 1 | 1 | 1 | 1 | 1 | 0 | 0 | 1 | 1 | 1 | 1 | 0 | 10 | 76,9 |
| Raymond-Barker et al.<br>(2007) [66] | 1 | 1 | 1 | 1 | 1 | 1 | 0 | 1 | 1 | 1 | 1 | 0 | 0 | 10 | 76,9 |
| Sygo et al.<br>(2018) [61]           | 1 | 1 | 1 | 0 | 1 | 1 | 0 | 0 | 1 | 1 | 0 | 1 | 1 | 9  | 69,2 |
| Walsh et al.<br>(2020) [58]          | 1 | 1 | 0 | 1 | 1 | 1 | 0 | 0 | 1 | 1 | 1 | 1 | 0 | 9  | 69,2 |
| Maïmoun et al.<br>(2013) [67]        | 1 | 1 | 0 | 1 | 1 | 0 | 0 | 0 | 1 | 1 | 1 | 1 | 1 | 9  | 69,2 |
| Duckham et al.<br>(2013) [65]        | 1 | 1 | 1 | 1 | 1 | 1 | 0 | 0 | 1 | 1 | 1 | 0 | 0 | 9  | 69,2 |
| Pollock et al.<br>(2010) [32]        | 1 | 1 | 0 | 1 | 1 | 1 | 0 | 0 | 1 | 1 | 1 | 1 | 0 | 9  | 69,2 |

|                                       |   |   |   |   |   |   |   |   |   |   |   |   |   |   |      |
|---------------------------------------|---|---|---|---|---|---|---|---|---|---|---|---|---|---|------|
| Trutschnigg et al. (2008) [74]        | 1 | 1 | 1 | 1 | 1 | 0 | 0 | 0 | 1 | 1 | 1 | 1 | 0 | 9 | 69,2 |
| Thompson (2009) [48]                  | 1 | 1 | 0 | 1 | 1 | 1 | 0 | 0 | 1 | 1 | 1 | 1 | 0 | 9 | 69,2 |
| Mudd et al. (2007) [34]               | 1 | 1 | 1 | 1 | 1 | 0 | 0 | 1 | 1 | 1 | 1 | 0 | 0 | 9 | 69,2 |
| Meyer et al. (2004) [76]              | 1 | 1 | 1 | 1 | 1 | 1 | 0 | 0 | 1 | 1 | 1 | 0 | 0 | 9 | 69,2 |
| Cobb et al. (2003) [55]               | 1 | 1 | 1 | 1 | 1 | 0 | 0 | 0 | 1 | 1 | 1 | 1 | 0 | 9 | 69,2 |
| Helge and Kanstrup (2002) [72]        | 1 | 1 | 1 | 1 | 1 | 0 | 0 | 0 | 1 | 1 | 0 | 1 | 1 | 9 | 69,2 |
| Beckvid Henriksson et al. (2000) [53] | 1 | 1 | 0 | 1 | 1 | 0 | 0 | 0 | 1 | 1 | 1 | 1 | 1 | 9 | 69,2 |
| Dimitriou et al. (2013) [45]          | 1 | 1 | 1 | 1 | 1 | 0 | 0 | 0 | 1 | 1 | 1 | 1 | 0 | 9 | 69,2 |
| Nattiv et al. (2013) [41]             | 1 | 1 | 0 | 1 | 1 | 1 | 0 | 0 | 1 | 1 | 0 | 1 | 1 | 9 | 69,2 |
| Czajkowska et al. (2013) [71]         | 1 | 1 | 0 | 1 | 1 | 0 | 0 | 0 | 1 | 1 | 1 | 1 | 0 | 8 | 61,5 |
| Tenforde et al. (2017) [33]           | 1 | 1 | 0 | 1 | 1 | 1 | 0 | 0 | 1 | 1 | 1 | 0 | 0 | 8 | 61,5 |
| Prather et al. (2016) [40]            | 1 | 0 | 0 | 0 | 1 | 1 | 0 | 0 | 1 | 1 | 1 | 1 | 1 | 8 | 61,5 |
| Muia et al. (2015) [52]               | 0 | 0 | 1 | 1 | 1 | 1 | 0 | 0 | 1 | 1 | 1 | 1 | 0 | 8 | 61,5 |

|                                        |   |   |   |   |   |   |   |   |   |   |   |   |   |   |      |
|----------------------------------------|---|---|---|---|---|---|---|---|---|---|---|---|---|---|------|
| Di Cagno et al.<br>(2012) [36]         | 1 | 1 | 0 | 0 | 1 | 0 | 0 | 0 | 1 | 1 | 1 | 1 | 1 | 8 | 61,5 |
| Dusek (2001)<br>[39]                   | 1 | 1 | 0 | 1 | 1 | 1 | 0 | 0 | 1 | 1 | 1 | 0 | 0 | 8 | 61,5 |
| Duckham et al.<br>(2015) [47]          | 0 | 1 | 1 | 0 | 1 | 0 | 0 | 0 | 1 | 1 | 1 | 0 | 1 | 7 | 53,8 |
| Hoch et al.<br>(2007) [64]             | 1 | 1 | 1 | 1 | 1 | 0 | 0 | 0 | 1 | 0 | 0 | 1 | 0 | 7 | 53,8 |
| Muñoz et al.<br>(2004) [70]            | 1 | 1 | 0 | 1 | 1 | 0 | 0 | 0 | 1 | 1 | 0 | 1 | 0 | 7 | 53,8 |
| Klentrrou and<br>Plyley (2003)<br>[31] | 1 | 1 | 0 | 1 | 1 | 0 | 0 | 0 | 1 | 1 | 0 | 1 | 0 | 7 | 53,8 |
| Egan et al.<br>(2003) [37]             | 0 | 1 | 0 | 1 | 1 | 0 | 0 | 0 | 1 | 1 | 1 | 0 | 1 | 7 | 53,8 |
| Ramsay and<br>Wolman (2001)<br>[38]    | 1 | 1 | 0 | 0 | 1 | 0 | 0 | 0 | 1 | 0 | 1 | 1 | 1 | 7 | 53,8 |

Table S3: Supplementary data.

| Study                                   | Country                            | Body mass (kg) | Body height (m) | Trainings (hours per week)                                 | Primary amenorrhea definition                    | Secondary amenorrhea definition                                            | Oligomenorrhea definition            |
|-----------------------------------------|------------------------------------|----------------|-----------------|------------------------------------------------------------|--------------------------------------------------|----------------------------------------------------------------------------|--------------------------------------|
| Team sports                             |                                    |                |                 |                                                            |                                                  |                                                                            |                                      |
| Dusek (2001) [39]                       | Croatia                            | NA             | NA              | 18 ± 0                                                     | non-appearance of menarche up to 16 years of age | absence of menstruation for more than 3 months in the post-menarche period | NA                                   |
| Tenforde et al. (2017) [33]             | USA                                | NA             | NA              | NA                                                         | non-appearance of menarche up to 16 years of age | less than 6 periods per year                                               | 6-9 periods per year                 |
| Mudd, Fornetti and Pivarnik (2007) [34] | USA                                | 63.2 ± 10.6    | 1.66 ± 0.08     | NA (collegiate athletic association division I university) | NA                                               | 0 to 3 menstrual cycles per year                                           | 4-9 cycles per year                  |
| Egan et al. (2003) [37]                 | Sweden, USA, Canada national teams | 68.2 ± 1.2     | 1.68 ± 0.01     | 8.1 ± 1.8 sessions/week                                    | non-appearance of menarche up to 15 years of age | three or less menstruations per year                                       | cycles of between 45 and 90 days     |
| Prather et al. (2016) [40]              | USA                                | NA             | NA              | 9,5 ± 6                                                    | non-appearance of menarche up to 15 years of age | 3 or more missed periods in the past year                                  | NA                                   |
| Ramsay and Wolman (2001) [38]           | UK                                 | 55,7 ± 6,9     | 165 ± 7         | NA                                                         | NA                                               | no more than one period in the six months                                  | cycle length of greater than 35 days |
| Cyclic sports                           |                                    |                |                 |                                                            |                                                  |                                                                            |                                      |

|                                         |          |                |                 |                                                            |                                                  |                                                                    |                                                                            |
|-----------------------------------------|----------|----------------|-----------------|------------------------------------------------------------|--------------------------------------------------|--------------------------------------------------------------------|----------------------------------------------------------------------------|
| Thompson (2007) [48]                    | USA      | NA             | NA              | $9,1 \pm 5,7$                                              | NA                                               | have not had a menstrual period for 6 months                       | have a menstrual period every 6 weeks                                      |
| Jesus et al. (2021) [42]                | Portugal | $51,0 \pm 4,1$ | $165,8 \pm 5,1$ | $14,8 \pm 5,4$                                             | NA                                               | cycles 4 and more months long                                      | cycles 2-3 months long                                                     |
| Barrack, Rauch, and Nichols (2008) [49] | USA      | $55,9 \pm 0,7$ | $164,8 \pm 0,7$ | NA                                                         | no onset of menarche by age 15 years             | absence of three consecutive menstrual cycles in the past year     | interval between menses more 35 days and less than 90 day in the past year |
| Barrack et al. (2010) [50]              | USA      | 52,75          | 164,55          | NA                                                         | no onset of menarche by age 15 years             | absence of three consecutive menstrual cycles in the past year     | interval between menses more 35 days and less than 90 day in the past year |
| Mudd, Fornetti and Pivarnik (2007) [34] | USA      | $57,2 \pm 5.6$ | $165,1 \pm 6.5$ | NA (collegiate athletic association division I university) | NA                                               | 0 to 3 menstrual cycles per year                                   | 4-9 cycles per year                                                        |
| Tenforde et al. (2017) [33]             | USA      | NA             | NA              | NA                                                         | non-appearance of menarche up to 16 years of age | less than 6 periods per year                                       | 6-9 periods per year                                                       |
| Hutson et al. (2021) [51]               | UK       | NA             | NA              | NA                                                         | NA                                               | no menses for at least the previous 90 days                        | less than nine periods over the previous 12 months                         |
| Muia et al. (2015) [52]                 | Kenya    | $48,5 \pm 6,1$ | $159,2 \pm 5,8$ | NA                                                         | absence of menstrual cycle by age 15             | no menstrual cycle for more than 90 continuous days after menarche | cycles longer than 45 days                                                 |
| Beckvid Henriksson, Schnell, and        | Sweden   | $54,7 \pm 1,0$ | $169,8 \pm 1,1$ | $10,0 \pm 0,7$                                             | menstrual bleeding never occurred                | cessation of menstrual bleedings for more than 3 successive months | interval pattern exceeding 6 weeks                                         |

|                                           |         |            |             |            |                                                  |                                                                            |                                                                          |
|-------------------------------------------|---------|------------|-------------|------------|--------------------------------------------------|----------------------------------------------------------------------------|--------------------------------------------------------------------------|
| Hirschberg (2000) [53]                    |         |            |             |            |                                                  |                                                                            |                                                                          |
| Pollock et al. (2010) [32]                | UK      | 52,8 ± 4,8 | 166,0 ± 1,0 | 13,4 ± 5,2 | NA                                               | 0–3 cycles/year                                                            | 4–9 cycles/year                                                          |
| Burrows et al. (2003) [54]                | UK      | 57,3 ± 6   | 165,0 ± 6   | 8 ± 5      | NA                                               | 0–3 cycles a year                                                          | 0–9 cycle a year                                                         |
| Cobb et al. (2003) [55]                   | USA     | 58,1 ± 1,2 | 166,1 ± 1   | NA         | NA                                               | fewer than 4 cycles in the past year                                       | 4–9 menstrual cycles per year                                            |
| Dusek (2001) [39]                         | Croatia | NA         | NA          | 18 ± 4     | non-appearance of menarche up to 16 years of age | absence of menstruation for more than 3 months in the post-menarche period | NA                                                                       |
| Tenforde et al. (2015) [56]               | USA     | 55,0 ± 8,5 | 163,9 ± 7,2 | NA         | non-appearance of menarche up to 16 years of age | less than 6 periods per year                                               | 6–9 periods per year                                                     |
| Rauh, Barrack and Nichols (2014) [57]     | USA     | 57,9 ± 8   | 163,9 ± 6,6 | NA         | no onset of menses by age 15 years               | cessation of menstrual cycles for ≥3 consecutive months in the past year   | cessation of menstrual cycles for ≥3 consecutive months in the past year |
| Gibson et al. (2000) [44]                 | UK      | 56,4       | 164         | NA         | NA                                               | 0–3 cycles/year                                                            | 4–9 cycles/year                                                          |
| Walsh, Crowell and Merenstein (2020) [58] | USA     | 59,0 ± 3,8 | 167,9 ± 5,3 | NA         | NA                                               | NA                                                                         | NA                                                                       |
|                                           |         | 72,8 ± 8,6 | 176,3 ± 6,6 | NA         | NA                                               | NA                                                                         | NA                                                                       |
| Dimitriou et al. (2014) [45]              | UK      | 61,2 ± 1,8 | 171,8 ± 5,5 | 15,3 ± 4,1 | NA                                               | 0–3 cycles per year                                                        | 4–9 cycles per year                                                      |
| Coste et al. (2011) [59]                  | France  | 55,0 ± 5,8 | 164,4 ± 4,9 | 15,1 ± 3,9 | NA                                               | NA                                                                         | NA                                                                       |



|                                               |              |            |             |            |                                                                                                                                                                                                        |                                                                                                                   |                                                                                            |
|-----------------------------------------------|--------------|------------|-------------|------------|--------------------------------------------------------------------------------------------------------------------------------------------------------------------------------------------------------|-------------------------------------------------------------------------------------------------------------------|--------------------------------------------------------------------------------------------|
| Schtscherbyna et al. (2009) [43]              | Brazil       | 58,3 ± 6,2 | 164,0 ± 7   | 13,9 ± 3,6 | absence of menstrual blood flow at age 16 y or, in the absence of pubertal development, at age 14 y                                                                                                    | an absence of menstrual blood flow for 6 mo or for a period equal to the total of three previous menstrual cycles | menstrual cycles longer than 35 days                                                       |
| Tsukahara et al. (2021) [60]                  | Japan        | 54,2 ± 4,8 | 163,5 ± 4,9 | NA         | menarche having not occurred by the age of 15 years in the absence of secondary sexual characteristics or by the age of 16 years in the presence of normal growth and secondary sexual characteristics | menstrual cycle cessation of more than 3 months after regular menses                                              | menstrual cycle duration of more than 35 days with 4–9 menstrual cycles over the past year |
| Sygo et al. (2018) [61]                       | Canada       | 60,4 ± 4,3 | 167,0 ± 6   | 15 ± 6,2   | NA                                                                                                                                                                                                     | NA                                                                                                                | NA                                                                                         |
| Robbeson, Havemann-Nel and Wright (2013) [62] | South Africa | 60,2       | 171         | NA         | NA                                                                                                                                                                                                     | the absence of three or more consecutive (~ 90 days) menstrual cycles                                             | menstrual periods at intervals greater than 35 days                                        |
| Nattiv et al. (2013) [41]                     | USA          | 57,7 ± 1,6 | 166,9 ± 1,3 | NA         | NA                                                                                                                                                                                                     | NA                                                                                                                | NA                                                                                         |
| Feldmann et al. (2011) [63]                   | USA          | NA         | NA          | NA         | NA                                                                                                                                                                                                     | more than 90 days since LMP or having missed 3 consecutive cycles in the 12 months preceding the study.           | less than 9 periods/ year                                                                  |
| Hoch, Stavrakos and Schimke (2007) [64]       | USA          | NA         | NA          | NA         | NA                                                                                                                                                                                                     | NA                                                                                                                | NA                                                                                         |
| Duckham et al. (2015) [47]                    | UK           | 54,8 ± 5,1 | 167 ± 5     | 12,6 ± 4,5 | NA                                                                                                                                                                                                     | NA                                                                                                                | less than 9 periods/ year                                                                  |
|                                               | UK           | 55,4       | 167         | 12,9       | NA                                                                                                                                                                                                     | NA                                                                                                                | less than 9 periods/ year                                                                  |

|                                                  |                                    |              |               |              |                                                  |                                                                    |                                  |
|--------------------------------------------------|------------------------------------|--------------|---------------|--------------|--------------------------------------------------|--------------------------------------------------------------------|----------------------------------|
| Duckham et al. (2013) [65]                       |                                    |              |               |              |                                                  |                                                                    |                                  |
| Raymond-Barker, Petroczi and Quested (2007) [66] | UK                                 | 58,9 ± 6,79  | 164,38 ± 6,36 | 8,96 ± 6,36  | lack of menarche                                 | absence of more than 3 periods                                     | irregular periods                |
| Haakonssen et al. (2014) [46]                    | Australia                          | 58,4 ± 5,9   | 170,0 ± 7     | NA           | NA                                               | menstrual cycle had ceased for more than 3 months in the past year | NA                               |
| Other individual sports                          |                                    |              |               |              |                                                  |                                                                    |                                  |
| Trutschnigg et al. (2008) [74]                   | Canada                             | 58.73 ± 7.92 | 164.8 ± 8.5   | 11.57 ± 4.56 | NA                                               | no menstrual cycle for 90 days or more                             | cycles longer than 35 days       |
| Tenforde et al. (2017) [33]                      | USA                                | NA           | NA            | NA           | non-appearance of menarche up to 16 years of age | less than 6 periods per year                                       | 6-9 periods per year             |
| Egan et al. (2003) [37]                          | Sweden, USA, Canada national teams | 53.7 ± 5.8   | 164.0 ± 0.05  | 13.7 ± 1.4   | non-appearance of menarche up to 15 years of age | three or less menstruations per year                               | cycles of between 45 and 90 days |
| Mudd, Fornetti and Pivarnik (2007) [34]          | USA                                | 58.6 ± 8.1   | 157.9 ± 6.3   | NA           | NA                                               | 0 to 3 menstrual cycles per year                                   | 4-9 cycles per year              |
| Corujeira et al. (2012) [73]                     | Portugal                           | NA           | NA            | 18           | NA                                               | NA                                                                 | NA                               |
| Helge and Kanstrup (2002) [72]                   | Denmark                            | 165          | 53,7 ± 6,0    | 23,5 ± 2,4   | NA                                               | a menstrual cycle of more than 90 days                             | menstrual cycle of 36–90 days    |
|                                                  | China                              |              | 165,1 ± 6,1   | 28           |                                                  |                                                                    |                                  |

|                                 |               |              |              |              |                                                         |                                             |                                                                                                 |
|---------------------------------|---------------|--------------|--------------|--------------|---------------------------------------------------------|---------------------------------------------|-------------------------------------------------------------------------------------------------|
| Meng et al. (2020) [35]         |               | 50,7 ± 5,9   |              |              | the absence of menarche by the age of 15 years          | the absence of menses for at least 3 months | menstrual cycles of longer than 35 days in duration                                             |
| Roupas et al. (2014) [68]       | France        | 52,0 ± 4,8   | NA           | 40,8 ± 13,9  | the absence of menarche by the age of 15 years          | bsence of menstruation for 3 months         | presence of menstrual interval of more than 35 days, with four to nine periods in the past year |
| Maïmoun et al. (2013) [67]      | France        | 52,4 ± 4,7   | 166,9 ± 5,5  | 41,4 ± 13,8  | absence of menstruation in girls above 15 years         | absence of menstruation for 3 months        | menstrual interval of more than 35 days, with 4–9 periods in the past year                      |
| Salbach et al. (2007) [69]      | Germany       | NA           | 161 ± 9      | 20.9 ± 7.3   | NA                                                      | NA                                          | NA                                                                                              |
| Muñoz et al. (2004) [70]        | Spain         | 48 ± 7       | 161,8 ± 6    | 20           | NA                                                      | NA                                          | NA                                                                                              |
| Czajkowska et al. (2019) [71]   | Poland        | NA           | NA           | 12           | NA                                                      | menstrual cycles <3 months long             | menstrual cycles 3-6 months long                                                                |
| Klinkowski et al. (2008) [30]   | Germany       | 49,7 ± 8,4   | 164 ± 7      | 18,9         | menstruation either failed to occur until the age of 15 | absent for the last three months            | NA                                                                                              |
| Klentrou and Plyley (2003) [31] | Canada, Greek | 49,7± 1,7    | 167,3 ± 1,5  | 22,5         | NA                                                      | NA                                          | NA                                                                                              |
| Di Cagno et al. (2012) [36]     | Italy         | 49.5 ± 5,1   | 170 ± 1      | 30,7 ± 14,1  | NA                                                      | NA                                          | NA                                                                                              |
| Helge and Kanstrup (2002) [72]  | Denmark       | 54,5 ± 5,8   | 165          | 21,0 ± 5,1   | NA                                                      | a menstrual cycle of more than 90 days      | menstrual cycle of 36–90 days                                                                   |
| Coelho et al. (2013) [75]       | Brazil        | 52,28 ± 7,74 | 159,5 ± 6,06 | 10,62 ± 3,46 | NA                                                      | NA                                          | NA                                                                                              |
| Winter sports                   |               |              |              |              |                                                         |                                             |                                                                                                 |
|                                 | USA           |              | 165.6 ± 0.1  | NA           |                                                         | less than 3 periods per year                |                                                                                                 |

|                             |  |               |  |  |                                       |  |                                  |
|-----------------------------|--|---------------|--|--|---------------------------------------|--|----------------------------------|
| Meyer et al.<br>(2004) [76] |  | 63.0 ±<br>6.5 |  |  | no menses till the age of 16<br>years |  | three to six periods per<br>year |
|-----------------------------|--|---------------|--|--|---------------------------------------|--|----------------------------------|
